1 **Synchrotron FTIR and Raman spectroscopy provide unique spectral fingerprints for**  
2 ***Arabidopsis* floral stem vascular tissues**

3

4 **Running title:** Spectral fingerprint of *Arabidopsis* vascular system

5

6 **Authors:** Dinant S<sup>1</sup>, Wolff N<sup>1</sup>, De Marco F<sup>1</sup>, Vilaine F<sup>1</sup>, Gissot L<sup>1</sup>, Aubry E<sup>1</sup>, Sandt C<sup>2</sup>, Bellini  
7 C<sup>1,3</sup>, and Le Hir R<sup>1,\*</sup>

8

9 **Affiliations**

10 <sup>1</sup> Institut Jean-Pierre Bourgin, INRA, AgroParisTech, CNRS, Université Paris-Saclay, 78000  
11 Versailles, France

12 <sup>2</sup> Synchrotron SOLEIL, Ligne SMIS, L'Orme des Merisiers, 91192 Gif sur Yvette, France

13 <sup>3</sup> Umeå Plant Science Centre, Department of Plant Physiology, Umeå University, 90183 Umeå,  
14 Sweden

15

16 **\*: Corresponding author:** Dr. R. Le Hir

17 Telephone: +33 1 30 83 30 57

18 Fax: +33 1 30 83 30 96

19 [rozenn.le-hir@inra.fr](mailto:rozenn.le-hir@inra.fr)

20 ORCID ID: 0000-0001-6076-5863

21

22 Co-authors email addresses:

23 Sylvie Dinant: [sylvie.dinant@inra.fr](mailto:sylvie.dinant@inra.fr)

24 Nelly Wolff: [nelly.wolff@inra.fr](mailto:nelly.wolff@inra.fr)

25 Federica De Marco: [demarco.federica@gmail.com](mailto:demarco.federica@gmail.com)

26 Françoise Vilaine: [francoise.vilaine@inra.fr](mailto:francoise.vilaine@inra.fr)

27 Lionel Gissot: [lionel.gissot@inra.fr](mailto:lionel.gissot@inra.fr)

28 Emilie Aubry: [emilia.aubry@inra.fr](mailto:emilia.aubry@inra.fr)

29 Christophe Sandt: [christophe.sandt@synchrotron-soleil.fr](mailto:christophe.sandt@synchrotron-soleil.fr)

30 Catherine Bellini: [catherine.bellini@inra.fr](mailto:catherine.bellini@inra.fr), [catherine.bellini@umu.se](mailto:catherine.bellini@umu.se)

31

32 Number of figures: 4

33 Number of tables: 6

34 Word count: 5784

35 Number of supplementary figures: 3

36

37 **Highlight (30 words)**

38 Combining vibrational spectroscopy techniques and multivariate analysis shows that the  
39 disruption of *SWEET* genes impacts phloem cell wall composition and that the effect on xylem  
40 cell wall composition is cell-specific.

41

42 **Abstract (200 words)**

43 Cell walls are highly complex structures that are modified during plant growth and  
44 development. For example, the development of phloem and xylem vascular cells, which  
45 participate in the transport of sugars and water as well as support, can be influenced by cell-  
46 specific cell wall composition. Here, we used synchrotron radiation-based infrared (SR-FTIR)  
47 and Raman spectroscopy to analyze the cell wall composition of wild-type and double mutant  
48 *sweet11-1sweet12-1*, which impairs sugar transport, Arabidopsis floral stem vascular tissue.  
49 The FTIR spectra showed that in addition to modified xylem cell wall composition, phloem cell  
50 walls in the double mutant line were characterized by modified hemicellulose composition.  
51 Moreover, combining Raman spectroscopy with a Classification and Regression Tree (CART)  
52 method identified combinations of Raman shifts that could distinguish xylem vessels and fibers.  
53 Additionally, the disruption of *SWEET11* and *SWEET12* genes impacts xylem cell wall  
54 composition in a cell-specific manner, with changes in hemicelluloses and cellulose observed  
55 at the xylem vessel interface. These results suggest that the facilitated transport of sugars by

56 transporters that exist between vascular parenchyma cells and conducting cells is important to  
57 ensuring correct phloem and xylem cell wall composition.

58

59 **Keywords (6-10 words)**

60 Arabidopsis, floral stem, phloem, xylem, cell wall, synchrotron radiation, FTIR, Raman  
61 spectroscopy, multivariate analysis, CART method

62

## 63 **Introduction**

64           The presence of a polysaccharide-rich frame is an important feature of plant cells. The  
65 primary cell wall, composed mainly of insoluble (cellulose and hemicelluloses) and soluble  
66 polysaccharides (pectins), is deposited when plant cells are growing. Once the cells stop  
67 growing, the primary cell wall is reinforced by a secondary cell wall (SCW), which is composed  
68 mainly of cellulose, hemicelluloses and lignin. To ensure their specialized function in structural  
69 support and water transportation, the xylem vessels and fibers have an even thicker SCW.  
70 Secondary cell wall production in plant cells is of interest to humans because it constitutes the  
71 major component of plant biomass and could therefore be used as a raw material for food,  
72 clothing and energy. The model plant *Arabidopsis thaliana* can be used to study the SCW in  
73 cells of vascular bundles within the floral stem. Anatomically, the vascular bundles are  
74 composed of phloem and xylem tissues, and represent a central hub through which most  
75 biological compounds are transmitted to their site of use. Phloem tissue - composed of phloem  
76 parenchyma cells, companion cells and sieve elements (SE) - is involved in the transport of  
77 multiple compounds such as sugars, amino acids, proteins and mRNA (Le Hir *et al.*, 2008). A  
78 thickening of the phloem SE cell wall has been reported in *Arabidopsis*, and it was suggested  
79 that this cell wall is composed of pectic polysaccharides (Freshour *et al.*, 1996). On the other  
80 hand, mature xylem tissue - responsible for structural support as well as the transportation of  
81 water and solutes - is composed of xylem tracheary elements (xylem vessels), xylary fibers and  
82 xylem parenchyma cells (Schuetz *et al.*, 2012), and is characterized by the presence of thick  
83 SCWs. Recently, researchers used high-throughput immunolabelling of the major cell-wall  
84 glycan epitopes to cluster floral stem tissues according to their cell wall composition, with the  
85 results revealing a tissue-specific pattern for the studied epitopes (Hall *et al.*, 2013). Moreover,  
86 the same researchers showed that this tissue-specific distribution changes markedly according  
87 to the floral stem developmental stage (Hall *et al.*, 2013). However, we still lack precise  
88 information about cell wall composition at the cellular level. Among the tools that can provide  
89 spatial resolution at such a level, vibrational microspectroscopy approaches boast several strong  
90 advantages.

91           Vibrational spectroscopy techniques (e.g. Fourier-transformed infrared spectroscopy  
92 (FTIR), Raman spectroscopy) have been used extensively in plant research to decipher the cell  
93 wall composition in an organ-specific manner (Largo-Gosens *et al.*, 2014). Classically, FTIR  
94 microspectroscopy uses a thermal source to identify differences in the cell wall composition of  
95 wild-type and mutant plants with a spatial resolution of approximately 30-50  $\mu\text{m}$  (Sibout *et al.*,

96 2005; Lefebvre *et al.*, 2011). The coupling of a focal plan array (FPA) detector to a conventional  
97 FTIR microscope allows researchers to obtain structural information at the cellular level  
98 (Gorzsás *et al.*, 2011; Ohman *et al.*, 2013). Another powerful modification is the use of a  
99 synchrotron IR light source (SR-FTIR), which enables the collection of IR spectra at higher  
100 spatial resolution (i.e. cellular level) due to light that is at least 100 times brighter than that of  
101 a thermal source. However, this possibility has seen limited use in the plant biology field  
102 (Vijayan *et al.*, 2015). In addition to IR microspectroscopy, Raman microspectroscopy is  
103 commonly used to study plant cell wall composition (Gierlinger *et al.*, 2012). Regarding the  
104 plant model *Arabidopsis thaliana*, only a few studies have investigated the compositions of cell  
105 walls in the floral stem (Schmidt *et al.*, 2010; Prats Mateu *et al.*, 2016) despite the important  
106 physiological role of this plant organ. The floral stem, which supports the flowers and the fruits,  
107 is also a major contributor to lifetime carbon gain (Earley *et al.*, 2009), representing 40% of a  
108 plant's total biomass. The precise characterization of the cell wall compositions of different  
109 vascular cell types within the floral stem is necessary to better understand cell wall complexity  
110 within such tissues.

111 In addition to the identification of differences in plant cell wall composition at the tissue  
112 and cell levels, there are many unanswered questions regarding the modalities of sugar  
113 allocation, which directly influence the supply of carbohydrate skeletons required for SCW  
114 formation. We have previously focused on identifying the carbohydrate components underlying  
115 xylem secondary cell wall formation in *Arabidopsis thaliana*. By using conventional FTIR  
116 microspectroscopy, we identified cell wall modifications in the xylem of *Arabidopsis* double  
117 mutant defective in the expression of sugar facilitators *SWEET11* and *SWEET12* (Le Hir *et al.*,  
118 2015). Both genes encode proteins that transport sugars (sucrose, glucose or fructose) along the  
119 concentration gradient (Chen *et al.*, 2012; Le Hir *et al.*, 2015) and, as such, their disruption  
120 modifies cellulose and xylan acetylation in xylem cell walls within the floral stem (Le Hir *et*  
121 *al.*, 2015). In that study, the FTIR spectra were acquired over a 30x30 µm target zone, which  
122 encompasses different cell types. Moreover, the use of conventional FTIR on “dry-fixed” floral  
123 stem sections did not allow the acquisition of spectra describing phloem tissue. As *SWEET11*  
124 and *SWEET12* are expressed in both the phloem and xylem, spectral data at the cellular level  
125 are needed to better understand how modifications of sugar homeostasis influence the cell wall  
126 composition of various cell types.

127 In the presented work, we chose to use SR-FTIR and Raman microspectroscopy in  
128 combination with a Classification and Regression Tree (CART) -based method to analyze

129 spectra collected for phloem and xylem tissues from *Arabidopsis thaliana* floral stem sections  
130 of wild-type and *sweet11-Isweet12-1* double mutant plants. Overall, we show that SR-FTIR  
131 can be successfully used to analyze spectra acquired from phloem tissue, as well as that changes  
132 in *SWEET11* and *SWEET12* expression affect phloem cell wall composition. Additionally, the  
133 application of the CART method on Raman spectra shows that xylem vessels and fibers can be  
134 distinguished by a combination of cellulose and hemicellulose Raman shifts. Finally, our results  
135 suggest that facilitated sugar transport modifications in xylem parenchyma cells lead to cell-  
136 specific defects.

137

## 138 **Materials and methods**

### 139 *Plant material and growth conditions*

140 *Arabidopsis* wild-type Col-0 line and *sweet11-Isweet12-1* (Le Hir *et al.*, 2015) double  
141 mutants were grown in soil in a greenhouse for five weeks under long-day conditions (16 h  
142 photoperiod and 150  $\mu\text{E m}^{-2} \text{s}^{-1}$  light intensity) at 22/15°C (day/night temperature) with 65%  
143 hygrometry. Floral stem segments were collected, fixed in 4% paraformaldehyde and embedded  
144 in paraffin. Sections with a thickness of 10  $\mu\text{m}$  were deposited onto BaF<sub>2</sub> windows and paraffin  
145 was removed using Histo-clear (National Diagnostics, Atlanta, GA). For FTIR and RAMAN  
146 spectroscopy, four xylem/phloem poles from four plants representing each genotype were  
147 analyzed.

148

### 149 *Synchrotron radiation FTIR microspectroscopy*

150 Infrared spectra were recorded with a synchrotron source to provide better spatial  
151 resolution due to superior brightness (SOLEIL, SMIS beamline, Gif sur Yvette, France). The  
152 transmission spectra were collected on a NICOLET 5700 FT-IR spectrometer coupled to a  
153 Continuum XL microscope (Thermo Fisher Scientific, Waltham, MA) equipped with a 32X  
154 NA 0.65 objective as described in Guillon *et al.* (2011). An average of thirty spectra were  
155 recorded from each xylem pole. All spectra were obtained in confocal mode to eliminate  
156 diffraction from surrounding cells using a double path single masking aperture size of 8  $\mu\text{m}$  x  
157 8  $\mu\text{m}$  (Fig. S1B). The spectra were collected over the 1800-800  $\text{cm}^{-1}$  infrared range at a spectral  
158 resolution of 4  $\text{cm}^{-1}$  with 256 co-added scans for the background and sample spectra.

159

160

## 161 *Raman microspectroscopy*

162 The Raman spectra were recorded using a DXR Raman Instrument (Thermo Fisher  
163 Scientific). Raman measurements were performed in a closed environment using a stabilized  
164 532 nm laser as described in Zimmermann et al. (2015). A 100X NA 0.90 objective was used  
165 for focusing and collecting inelastically scattered Raman light, and allowed us to reach a spatial  
166 resolution of 2  $\mu\text{m}$  x 2  $\mu\text{m}$  (Fig. S1C). The acquisition points were set as the cell walls between  
167 xylem vessels (VV), between xylem vessels and fibers (VF) and between xylem fibers (FF).  
168 The system was operated in 25  $\mu\text{m}$  aperture mode, which provided a spectral resolution of 2-4  
169  $\text{cm}^{-1}$ . In order to decrease xylem cell wall autofluorescence, the samples were photobleached  
170 for two minutes before each acquisition. Sample spectra were acquired over an exposure time  
171 of 6 x 10 s using 512 scans (the same amount of scans were also performed for the background).

172

## 173 *Preprocessing of SR-FTIR and Raman spectra*

174 Infrared spectra with extreme absorbance values, e.g. values less than 0.1 or above 1,  
175 were removed from the datasets so that saturation effects and errors due to holes in the tissue  
176 sections could be avoided. For the FTIR dataset, at least 150 spectra per tissue (collected from  
177 4 different plants per genotype) were analyzed. Comparisons between phloem and xylem  
178 spectra as well as wild-type and the double mutant *sweet11sweet12* spectra were performed on  
179 baseline-corrected and area-normalized spectra. For Raman microspectroscopy, the spectra of  
180 different xylem cell types were smoothed by the Savitsky-Golay algorithm (3<sup>rd</sup> order  
181 polynomial and nine-point filter). The spectra were then baseline-corrected by subtracting a  
182 linear baseline between 350-3500  $\text{cm}^{-1}$  and area-normalized. Both SR-FTIR and Raman spectra  
183 were preprocessed using Unscrambler software (The Unscrambler, CAMO Process AS, Oslo,  
184 Norway).

185

## 186 *Univariate analysis of the SR-FTIR and Raman spectra*

187 Peak area measurements were performed on baseline-corrected and area-normalized  
188 FTIR spectra in OMNIC 9.2.41 and TQ Analyst EZ 9.2.34 software (Thermo Scientific). In  
189 both cases, the baseline between the peak start and end marker was computer generated. The  
190 following peaks were measured for the SR-FTIR spectra: 930-1180  $\text{cm}^{-1}$  for cellulose; 1695-  
191 1770  $\text{cm}^{-1}$  for hemicellulose; and 1475-1520  $\text{cm}^{-1}$  for lignin. Average spectra and boxplot  
192 representations were generated in R software (R Core Team, 2016) using the HyperSpec and

193 Ggplot2 packages, respectively (Wickham, 2009; Beleites, 2012). Peak areas and their ratios  
194 were first checked for normality (Shapiro-Wilk test) and homoscedasticity (Levene test). Since  
195 neither of these criteria were fulfilled, an approximate (Monte Carlo) Fisher-Pitman  
196 permutation test was performed (non-parametric one-way ANOVA). Then, a pairwise  
197 comparison test, including the calculation of an adjusted *P*-value by the False Discovery Rate  
198 (FDR) method, was applied to assess the significance of observed differences. Statistical  
199 analysis was performed using the “coin”, and “RVAideMemoire” packages (Hothorn *et al.*,  
200 2008; Maxime, 2017) in R software (R Core Team, 2016).

201

## 202 *Multivariate statistical analysis of SR-FTIR and Raman spectra*

203 Preprocessed and mean-centered spectra were first subjected to Principal Component  
204 Analysis (PCA). The PCA was carried out with three to seven principal components (PC) using  
205 the NIPALS algorithm, and full cross-validation was applied. Outliers identified using the  
206 Hotelling T2 method (95% multivariate confidence interval) and the residual versus leverage  
207 plot were removed from the dataset. Since SR-FTIR and Raman techniques produce large  
208 dataset and variables are highly correlated, a variable selection algorithm (CovSel) was applied  
209 prior to the Classification and regression tree (CART) technique. The CovSel algorithm enables  
210 variable selection based on global covariance across all the responses (Roger *et al.*, 2011).  
211 Additionally, the CART technique can be used to select the variables that are most important  
212 to discriminating two factors (Berk, 2016). The CART-based model was first set up on a  
213 calibration dataset (representing 80% of the total spectra) and then validated on a validation  
214 dataset (representing 20% of the total spectra). A confusion table was then produced to validate  
215 the model. Model performance was evaluated using the following parameters: accuracy  
216  $(\frac{\sum \text{true positive} + \sum \text{true negative}}{\sum \text{total population}})$ ; specificity  $(\frac{\sum \text{true positive}}{\sum \text{true positive} + \text{false negative}})$ ; sensitivity  
217  $(\frac{\sum \text{true negative}}{\sum \text{true negative} + \text{false positive}})$ ; predictive positive value  $(\frac{\sum \text{true positive}}{\sum \text{true positive} + \text{false positive}})$ ; and  
218 negative predictive value  $(\frac{\sum \text{true negative}}{\sum \text{true negative} + \text{false negative}})$ . In the comparison of both genotypes,  
219 the true positive and true negative represent the number of wild-type or *sweet11-1sweet12-1*  
220 spectra that were correctly classified by the model. The false positive and false negative  
221 represent the number of wild-type or *sweet11-1sweet12-1* spectra that were incorrectly  
222 classified by the model. The multivariate analyses were performed in the ChemFlow interface  
223 within Galaxy (<https://vm-chemflow.toulouse.inra.fr/>).



## 224 **Results and discussion**

225 *Synchrotron FTIR (SR-FIR) allows the identification of unique spectral fingerprints for various*  
226 *floral stem vascular tissues.*

227 In the *Arabidopsis* floral stem, vascular tissues are organized as a series of vascular  
228 bundles that are linked together by interfascicular fibers (Fig. S1A). In each bundle, specialized  
229 conducting cells are subjected to high pressures to ensure sap flow, with hydrostatic pressure  
230 reaching upwards of 30 atmospheres in the sieve elements (Sjölund, 1997) while the xylem  
231 vessels are characterized by negative pressure. Cell-specific cell wall composition is a crucial  
232 part of conferring resistance to such pressure. A majority of the previous research has focused  
233 on deciphering xylem cell wall composition, while phloem tissue has received limited attention.

234 By harnessing the spatial resolution provided by Synchrotron light (8x8  $\mu\text{m}$  acquisition  
235 zone), we acquired spectra for phloem and xylem tissues of the *Arabidopsis* wild-type floral  
236 stem (Fig. S1A). Spectra were baseline corrected, area-normalized and the average spectrum  
237 for each tissue was calculated and plotted (Fig. 1A). Principal component analysis (PCA) was  
238 used to identify potential spectral fingerprints of the floral stem vascular tissues, with the first  
239 two components explaining 54% and 8% of the total variance (Fig. 1B). Component 1  
240 undoubtedly discriminates the phloem and xylem IR spectra (Fig. 1B). The loading plot of PC1  
241 reveals that xylem cell walls are characterized by a set of bands corresponding to guaiacyl ring  
242 breathing with carbonyl stretching ( $1269\text{ cm}^{-1}$ ) (Kubo and Kadla, 2005), -C-H- deformation in  
243 the guaiacyl ring with -C-O- deformation in the primary alcohol ( $1030\text{ cm}^{-1}$ ) (Kubo and Kadla,  
244 2005) and -C-C- linkage of G-condensed units ( $1060\text{ cm}^{-1}$ ). This suggests that xylem cell walls  
245 are mainly composed of G-type lignin (Fig. 1C and Table 1), and these results are in agreement  
246 with previous observations from *Arabidopsis thaliana* that showed that G-type lignin is  
247 responsible for the extra-thickening of the xylem vessel cell wall (Schuetz *et al.*, 2012).  
248 Additionally, the loading plot highlights several wavenumbers (1045, 1369, 1230-1235, 1743,  
249  $1245, 1735\text{-}1740\text{ cm}^{-1}$ ) that are related to hemicellulose enrichment in xylem cell walls, as has  
250 been previously reported for the *Arabidopsis* floral stem (Table 1) (Sibout *et al.*, 2005; Ohman  
251 *et al.*, 2013). However, some of these bands may partly overlap with the lignin bands ( $1236,$   
252  $1371$  and  $1736\text{ cm}^{-1}$ ) (Faix, 1991; Özparpucu *et al.*, 2017a). Interestingly, wavenumbers  
253 associated with pectic polysaccharides ( $1245$  and  $1762\text{ cm}^{-1}$ ) were also found to be more  
254 descriptive of xylem cell walls than of phloem cell walls (Fig. 1C and Table 1), even if pectins  
255 are not an abundant component of secondary cell walls. However, pectin methylesterification

256 appears to be a prerequisite for the lignin modification that occurs during secondary cell wall  
257 deposition in xylem cells (Pelloux *et al.*, 2007). In addition, several Arabidopsis mutants that  
258 are deficient in various pectins have been shown to present defects in secondary cell wall  
259 formation (Persson *et al.*, 2007; Lefebvre *et al.*, 2011).

260         Regarding phloem cell wall composition, the loading plot of PC1 reveals numerous  
261 wavenumbers related to pectic polysaccharides, cellulose and hemicelluloses (Fig. 1C and  
262 Table 1). For instance, the bands at 1639 cm<sup>-1</sup> and at 1677 cm<sup>-1</sup> are characteristic of the -COOH-  
263 group of acidic pectins present in the primary cell wall (Mouille *et al.*, 2006), while  
264 wavenumbers at 1111, 1157 and 1550 cm<sup>-1</sup> describe cellulose polymers (Table 1). Additionally,  
265 wavenumbers at 1442 and 1475 cm<sup>-1</sup> were unique for phloem cell walls. The 1442 cm<sup>-1</sup> band  
266 has been previously reported to describe the hypocotyl primary cell wall of a cellulose-deficient  
267 mutant, but the functional group that it represents still needs to be verified (Mouille *et al.*, 2003).  
268 Overall, these results suggest that the cell wall composition of phloem tissue, including phloem  
269 parenchyma cells, companion cells and sieve elements, is more closely related to primary cell  
270 wall composition even if cell wall thickening is commonly observed in sieve elements (SEs)  
271 (Esau and Cheadle, 1958). The nature of this thickening has not yet been completely clarified,  
272 but the current evidence favors a pectin-based composition (Freshour *et al.*, 1996; Torode *et*  
273 *al.*, 2017). The marker IR bands we identified in our tissue samples support these findings. It  
274 was initially surprising that pectins, which have been traditionally related to cellular expansion,  
275 can be found in a tissue that experiences high pressure during sap flow. The recent  
276 characterization of an antibody against branched pectic galactan that specifically binds to the  
277 cell walls of SEs led the authors to suggest that the role of pectin in these cell walls could be  
278 the maintenance of elastic properties required for withstanding high turgor pressure (Torode *et*  
279 *al.*, 2017). Additionally, the application of atomic force microscopy (AFM) has shown that the  
280 mechanical properties of phloem SE cell walls differ from those of cells from the surrounding  
281 tissue with an higher elasticity (Torode *et al.*, 2017; Johnson, 2018). The development of nano-  
282 IR techniques that combine AFM and Synchrotron IR light will open further possibilities for  
283 exploring the cell wall heterogeneity that exists among different vascular cell types.

284 *Phloem cell wall composition is impaired in the double mutant sweet11-1sweet12-1.*

285         In addition to presence in the xylem tissue, *SWEET11* and *SWEET12* expression has  
286 also been detected in phloem tissue, with the signal most probably arising from phloem  
287 parenchyma cells (Chen *et al.*, 2012; Le Hir *et al.*, 2015). Since the double mutant *sweet11-*

288 *Isweet12-1* shows defects in xylem cell wall formation, we analyzed whether similar defects in  
289 cell wall formation could be observed in phloem cells. Therefore, phloem and xylem IR spectra  
290 were recorded from the double mutant *sweet11-Isweet12-1* floral stem and compared to spectra  
291 acquired from the wild-type floral stem. The average spectra for wild-type (WT) and double  
292 mutant (DM) tissues were compared after baseline correction and area normalization over the  
293 1800-850  $\text{cm}^{-1}$  range (Supplementary Fig S2A and S2E). Next, the areas under the cellulose  
294 (C-O and C-C stretching) (930-1180  $\text{cm}^{-1}$ ), the hemicellulose (1695-1770  $\text{cm}^{-1}$ ) and/or lignin  
295 (1475-1520  $\text{cm}^{-1}$ ) peaks, along with their respective ratios, were measured (Fig. 2 and  
296 Supplementary Fig. S2B-D and S2F-G). A significant decrease in the lignin peak area of the  
297 xylem tissue was measured between both genotypes (Supplementary Fig. S2D), while a  
298 significant increase in the cellulose and the hemicelluloses peak areas was observed in xylem  
299 cell walls in the double mutant line compared to the wild-type (Supplementary Fig. S2B and  
300 C). The phloem tissue analysis showed that there was no significant difference in cellulose  
301 between the two genotypes (Supplementary Fig. S2F), while the hemicelluloses peak area in  
302 the double mutant line was significantly greater than what was observed in the wild-type  
303 (Supplementary Fig. S2G). More precisely, while the xylem cell walls of both genotypes  
304 showed similar cellulose/hemicellulose ratios (Fig. 2B), the phloem cell walls of the double  
305 mutant demonstrated a disequilibrium in the cellulose/hemicellulose ratio (Fig. 2G). Therefore,  
306 we show that in addition to affecting xylem cell wall composition, mutations in both *SWEET11*  
307 and *SWEET12* genes also impact phloem cell wall composition. However, these mutations seem  
308 to only affect the hemicellulose composition of phloem cell walls. In order to further identify  
309 wavenumbers that could be specifically associated with the *sweet11-Isweet12-1* double mutant,  
310 we applied a CART analysis procedure. For this purpose, our original dataset was split into  
311 calibration (80% of the total dataset) and validation (20% of the total dataset) datasets, after  
312 which the CovSel algorithm was applied to the calibration dataset to identify the 10  
313 wavenumbers with maximum covariance (Roger *et al.*, 2011). The CART tree resulting from  
314 the analysis shows that, out of the 10 selected wavenumbers, only five IR wavenumbers - at  
315 891, 1086, 1369, 1562 and 1712  $\text{cm}^{-1}$  - can be used to distinguish between the wild-type and  
316 *sweet11-Isweet12-1* phloem spectra (Fig. 2C). To evaluate the performance of this analysis, the  
317 CART model obtained from the calibration dataset was used as an input and applied on the  
318 validation dataset. Table 2 summarizes the results of both genotypes for the model calibration  
319 (after ten-fold cross-validation) and validation datasets. When applied on the calibration  
320 dataset, the CART model correctly classified 88.6% of the wild-type spectra (specificity) and  
321 92.5% (sensitivity) of the double mutant spectra. When applied on the validation dataset, the

322 model correctly classified 82.7% (specificity) and 79.5% (sensitivity) of the WT and DM  
323 spectra, respectively. Moreover, the predictive positive value (PPV) of the validation model  
324 was calculated to be 75%, which means that most of the identified WT spectra are not false  
325 positives (Table 2). On the other hand, the model's negative predictive value (NPV) was  
326 determined to be 86.1%, which means that a majority of the identified *sweet11-sweet12-1* DM  
327 spectra are not false positives (Table 2). Overall, the CART model was able to accurately  
328 predict 80.8% of the spectra present in the validation dataset (Table 2). In this way, the CART  
329 model produced using the calibration dataset can discriminate both genotypes based only on  
330 the analysis of five major FTIR wavenumbers. Among these marker wavenumbers, the 891  
331  $\text{cm}^{-1}$  wavenumber can be linked to the cellulose fingerprint region (Kačuráková *et al.*, 2002)  
332 while the 1086  $\text{cm}^{-1}$  and 1369  $\text{cm}^{-1}$  wavenumbers can be assigned to hemicelluloses (Robin *et*  
333 *al.*, 2003; Brown *et al.*, 2005). Additionally, the 1712  $\text{cm}^{-1}$  wavenumber could be related to  
334 carboxylic acid residues found in polygalacturonic acid (Pawar *et al.*, 2013). The remaining  
335 wavenumber, 1562  $\text{cm}^{-1}$ , still needs to be assigned to a cell wall compound. Interestingly, we  
336 previously found that the 1369  $\text{cm}^{-1}$  wavenumber (this work and (Le Hir *et al.*, 2015)) can  
337 differentiate WT xylem cell walls from the cell walls of the *sweet11-sweet12-1* double mutant.  
338 This wavenumber is related to the deformation of C–H linkages in the methyl group of *O*-acetyl  
339 moieties and could thus represent differences in xylan acetylation (Mohebbi, 2010). Therefore,  
340 the presented results suggest that sugar homeostasis modifications in plant vascular tissue  
341 predominantly influence the cellulose and/or xylan composition of cell walls regardless of cell  
342 type.

343 We previously postulated that the maintenance of sugar homeostasis among the xylem  
344 parenchyma cells and xylem vessels/fibers influenced the production of a normal cell wall (Le  
345 Hir *et al.*, 2015). Here, we show that it also constitutes a limiting step for the formation of  
346 phloem cell walls. Since *SWEET11* and *SWEET12* are expressed in the phloem and xylem  
347 parenchyma cells and participate in sugar influx or efflux across the plasma membrane (Chen  
348 *et al.*, 2012; Le Hir *et al.*, 2015), our data suggest that *SWEET11* and *SWEET12* are crucial for  
349 cell wall formation in vascular parenchyma cells. Interestingly, recent research has also found  
350 vascular parenchyma cells to be crucial in the supply of monolignols to developing xylem  
351 vessels (Smith *et al.*, 2017). Therefore, one could postulate that sugar (sucrose and/or hexoses)  
352 movement across a gradient, mediated by *SWEET11* and/or *SWEET12*, could also occur  
353 between vascular parenchyma cells and other developing vascular cells to drive cell wall  
354 formation.

355

356 *Identification of new Raman shift markers that describe the composition of cell walls between*  
357 *different xylem cell types in the wild-type Arabidopsis floral stem*

358 Xylem secondary cell wall formation constitutes a large pool of the plant's total  
359 biomass. For example, the xylem vessels and fibers are surrounded by a thick SCW that is 80%  
360 cellulose and hemicelluloses and 20% lignin (Marriott *et al.*, 2016). When the Arabidopsis  
361 floral stem is considered at the cellular level, xylem vessels and fibers demonstrate  
362 heterogeneous cell wall composition due to differences in the lignin monomer(s) with which  
363 the cell wall is enriched (Schuetz *et al.*, 2012). Unfortunately, we still lack a complete  
364 description of the polysaccharide composition of xylem vessel and fiber cell walls. We  
365 leveraged the spatial resolution provided by Raman microspectroscopy to precisely characterize  
366 the composition of cell walls between xylem vessels (VV), between xylem vessels and xylem  
367 fibers (VF) and between xylem fibers (FF) in the Arabidopsis wild-type floral stem (Fig. S1C,  
368 Fig. 3 and Supplementary Fig. 3).

369 The average Raman spectra for the various xylem cell types show that xylem fiber cell  
370 wall composition differs in comparison to what was observed in the other two cell types  
371 (Supplementary Fig. S3A). To test whether these differences were statistically significant, we  
372 calculated ratios of spectral peaks areas from already known Raman shift markers, namely,  
373 from 2775 to 3125  $\text{cm}^{-1}$  (the composite C-H stretching bands comprising cellulose and  
374 hemicelluloses), from 1550 to 1700  $\text{cm}^{-1}$  (lignin Raman shift) and from 1080 to 1140  $\text{cm}^{-1}$  (C-  
375 O and C-C bond stretches of cellulose) (Schmidt *et al.*, 2010; Agarwal, 2014) (Fig. 3). Based  
376 on these measurements, the VV and VF cell walls in wild-type Arabidopsis plants could not be  
377 statistically distinguished (Fig 3A-C). However, the ratio of lignin to C-H bonds as well as the  
378 ratio of lignin to C-O bonds can significantly discriminate the cell walls between xylem fibers  
379 (FF) from those between xylem vessels (VV) and xylem vessels and fibers (VF) (Fig. 3A and  
380 3B). There were no significant differences in the ratio of C-H bonds to C-O bonds between cell  
381 types (Fig. 3C). Therefore, the observed differences between cell walls between VV, VF and  
382 FF can mainly be attributed to a lower intensity of the aromatic ring stretching vibration  
383 (1598  $\text{cm}^{-1}$ ) in the cell walls between xylem fibers (Fig. S3A) (Özparpucu *et al.*, 2017b).

384 To further identify Raman shifts associated with different xylem cell types, a CART-  
385 based classification method was applied on the 1000-1800  $\text{cm}^{-1}$  Raman shift range, which  
386 includes the predominant constituents of the xylem cell wall (Prats Mateu *et al.*, 2016;  
387 Özparpucu *et al.*, 2017b). The CART model was built on the calibration dataset (80% of the



388 total dataset), without a variable selection step, and the resulting classification tree shows that  
389 only four Raman shifts are sufficient to distinguish the three different cell wall types (Fig. 3D).  
390 The overall accuracy of the model produced from the calibration dataset was 85.9%, with good  
391 prediction values (PPV) of 100%, 77.7% and 83.3% for the VV, VF and FF groups, respectively  
392 (Table 3). This model was then applied to the validation dataset (20% of the total dataset), and  
393 showed an accuracy value of 80%, which is close to that of the calibration dataset (Table 3).  
394 Even though the predictive sensitivity for spectra between adjacent xylem vessels (VV) was  
395 low, with only 50% of spectra correctly classified as VV spectra (Table 3), the PPVs for VF  
396 and FF spectra (87.5 and 100%, respectively) were good (Table 3). Therefore, our CART model  
397 can be used to distinguish VF and FF spectra, but the results should be interpreted with caution  
398 in the case of VV spectra. Nevertheless, our data show that the 1038, 1118, 1408 and 1258  $\text{cm}^{-1}$   
399 Raman shifts can be used to discriminate most of the different xylem cell wall types in wild-  
400 type Arabidopsis plants. Interestingly, the band around 1038  $\text{cm}^{-1}$  was reported to describe C-  
401 O stretching of mannan oligosaccharides (Maru *et al.*, 2015) while the Raman shift around 1256  
402  $\text{cm}^{-1}$  has been linked to hemicelluloses (Gierlinger *et al.*, 2008). The bands at 1121  $\text{cm}^{-1}$   
403 (symmetric  $\nu(\text{COC})$  glycosidic bond) and 1408  $\text{cm}^{-1}$  ( $\delta(\text{CH}_2)$  region) have also been assigned  
404 to cellulose (Edwards *et al.*, 1997; Chylinska *et al.*, 2014).

405 Earlier studies in Arabidopsis have clearly established that the cell walls of xylem  
406 interfascicular fibers and xylem vessels differ in terms of their lignin monomer composition  
407 (Schuetz *et al.*, 2012). Additionally, results from Poplar studies suggest that the cell wall  
408 composition of xylem fibers is an intermediate between that of xylem interfascicular fibers and  
409 xylem vessels (Gorzsás *et al.*, 2011). ToF-SIMS has previously been applied to measure  
410 differences in the S/G ratio between xylem fibers and vessels in *Populus* (Tolbert *et al.*, 2016).  
411 Our work shows that a combination of Raman shifts assigned to cellulose and hemicelluloses  
412 can also distinguish xylem cell types. This is in agreement with previous research, as the  
413 immunolabelling of mannan epitopes (LM10 and LM11 antibodies) in the Arabidopsis floral  
414 stem revealed a higher signal intensity in xylem fibers than in xylem vessels (Kim and Daniel,  
415 2012). This higher intensity of mannans in the xylem fiber cell wall could suggest that these  
416 compounds are more important to mechanical support than water conduction (Kim and Daniel,  
417 2012).

418

419 *Disruption of SWEET11 and SWEET12 expression differentially affects the cell wall*  
420 *composition of different xylem cell types*

421 To further understand how modifications in facilitated sugar transport influence xylem  
422 secondary cell wall formation, we acquired Raman spectra for different xylem cell types from  
423 the *sweet11-1sweet12-1* double mutant. As previously described, CART-based classifications  
424 were built to compare the different xylem cell types from both genotypes. For each cell type  
425 (VV, VF or FF), the original dataset was split into a calibration dataset and a validation dataset,  
426 after which the CovSel algorithm was applied on the calibration dataset to select the 10 Raman  
427 shifts showing maximum covariance. The CART models were then built on the calibration  
428 datasets and later applied on the validation datasets (Table 4, 5 and 6). The resulting CART tree  
429 classifications are displayed in Fig. 4. Regarding the cell walls between adjacent xylem vessels,  
430 two Raman shifts, namely, 1001 and 1093  $\text{cm}^{-1}$ , were sufficient to differentiate wild-type  
431 spectra from the double mutant spectra (Fig. 4A). Interestingly, these two Raman shifts have  
432 been shown to be associated with cellulose compounds (Gierlinger and Schwanninger, 2007;  
433 Özparpucu *et al.*, 2017b). Model performance was estimated for both calibration and validation  
434 datasets (Table 4), with the results demonstrating that the model can accurately discriminate  
435 spectra from both genotypes since the overall accuracy, sensitivity, specificity, PPV and NPV  
436 calculated for the validation dataset were between 76% and 90 % (Table 4).

437 Additionally, data obtained from the CART model produced using Raman spectra  
438 acquired for the walls between xylem vessels and fibers (VF spectra) show that seven Raman  
439 shifts - at 1093, 1134, 1296, 1372, 1606, 1618 and 1743  $\text{cm}^{-1}$  – can be used to discriminate the  
440 genotypes (Fig. 4B). The 1093  $\text{cm}^{-1}$  shift appears three times and the 1296 and 1743  $\text{cm}^{-1}$  shifts  
441 appear twice in the CART tree, suggesting that these three shifts are most important to  
442 discriminating the two genotypes (Fig. 4B). Based on the literature, the 1093 and 1372  $\text{cm}^{-1}$   
443 shifts are related to cellulose (Chylinska *et al.*, 2014; Özparpucu *et al.*, 2017b), while the 1743  
444  $\text{cm}^{-1}$  is assigned to the  $\nu(\text{C}=\text{O})$  ester in pectins or hemicelluloses compounds (Chylinska *et al.*,  
445 2014). The 1606 and 1618  $\text{cm}^{-1}$  Raman shifts have been reported to describe lignin bands (Prats  
446 Mateu *et al.*, 2016). The performance of the model produced from VF spectra (for both  
447 calibration and validation datasets) was similar to the previous model.

448 Finally, the CART tree built using the spectra acquired for the walls between adjacent  
449 xylem fibers (FF spectra) shows that four Raman shifts can be used to discriminate between the  
450 wild-type and double mutant spectra. These shifts occur at 1134, 1332, 1597 and 1691  $\text{cm}^{-1}$

451 (Fig. 4C), and are combined differently to distinguish both genotypes. The 1332 and 1597 cm<sup>-1</sup>  
452 shifts are used twice in the classification trees, suggesting that both of these shifts are  
453 important to differentiating the WT xylem fiber cell wall from the DM xylem fiber cell wall  
454 (Fig. 4C). Interestingly, both bands are related to lignin compounds (1332 cm<sup>-1</sup>: aliphatic O-H  
455 bending; 1597 cm<sup>-1</sup>: aromatic ring stretching) (Özparpucu *et al.*, 2017b). The different  
456 descriptors for the models built from the calibration and validation datasets range from 67 to  
457 89%, suggesting that the models can be used to distinguish the xylem fiber cell wall  
458 compositions of the two studied genotypes (Table 6).

459 To summarize, it seems that Raman shifts that discriminate cell walls between xylem  
460 vessels of the two genotypes are related to polysaccharides while the cell walls between xylem  
461 vessel/fibers and between adjacent fibers of the two genotypes can be discriminated using both  
462 lignin and polysaccharides shifts. The application of a CART-based analysis enabled us to  
463 identify new Raman shifts that could be used to better characterize the double mutant in a cell-  
464 specific manner. Interestingly, our previous analysis of the *sweet11-1sweet12-1* double mutant  
465 xylem cell wall did not reveal modifications in lignin composition. These discrepancies can be  
466 explained by the application of Raman microspectroscopy, which provided a spatial resolution  
467 of 2 μm x 2 μm, and therefore, the possibility to investigate individual cell types. The precision  
468 offered by Raman microspectroscopy suggests that the differences observed between wild-type  
469 and the *sweet11-1sweet12-1* mutant line could depend on the xylem cell type analyzed.  
470 Recently, Smith *et al.* (2017) demonstrated that xylem vessel lignification in the *Arabidopsis*  
471 floral stem is a non-cell-autonomous process that relies on the monolignol exchanges between  
472 xylem parenchyma or fiber cells and developing xylem vessels. If this model is extended to our  
473 research, it could be suggested that in addition to monolignols, sugar exchanges - mediated by  
474 SWEET facilitators - between xylem parenchyma cells and developing xylem vessels could  
475 also be commonplace in *Arabidopsis*.

476

## 477 **Conclusion**

478 Synchrotron radiation FTIR and Raman spectroscopy are powerful tools for studying cell wall  
479 composition in plants both at the tissue and cellular level. Here, the application of SR-FTIR  
480 allowed us to picture, for the first time, the cell wall composition of phloem tissue in the  
481 *Arabidopsis* floral stem. Furthermore, CART-based classification, calculated using the Raman  
482 spectra acquired for different xylem cell types, identified spectral wavenumbers that could be



483 leveraged to discriminate xylem cell types based also on their cellulose and hemicellulose  
484 composition. We also used both techniques to analyze the phenotype of the double mutant  
485 *sweet11-1sweet12-1*, which is deficient in the expression of two sugar facilitators that exist in  
486 vascular parenchyma cells. Our results showed unexpected changes in the hemicellulose  
487 composition of *sweet11-1sweet12-1* phloem cell walls when compared to WT plants. Moreover,  
488 analysis by Raman spectroscopy revealed that the disruption of both sugar transporters impacts  
489 xylem cell wall composition in a cell-specific manner. Therefore, SWEET11 and SWEET12  
490 are important to ensuring correct phloem and xylem cell wall composition. Further addressing  
491 the role of SWEET facilitators in plant growth and development provides an attractive research  
492 direction that could provide answers for how intercellular sugar movements influence  
493 developmental processes such as vascular system development. Additionally, this study  
494 highlights that vascular parenchyma cells have a pivotal role in supplying the carbon skeleton  
495 required for cell wall formation in vascular tissues. Finally, the research approach presented  
496 here offers the possibility of studying changes in cell wall polysaccharide composition at the  
497 cellular level, and could be applied to investigations of how sugar transport affects cell wall  
498 formation in the vascular tissue of both herbaceous and ligneous species.

499

## 500 **Supplementary data**

501 **Fig. S1.** Illustration of the different spatial resolutions offered by vibrational spectroscopy  
502 techniques.

503 **Fig. S2.** Comparison of SR-FTIR peak areas of cellulose, hemicelluloses and lignin between  
504 xylem or phloem tissues from WT and *sweet11-1sweet12-1* plants.

505 **Fig. S3.** Average Raman spectra for the different xylem cell types in wild-type and *sweet11-1*  
506 *Isweet12-1* lines.

507

## 508 **Acknowledgements**

509 We thank Bruno Letarnek for his assistance in the greenhouse. The research was supported by  
510 the SOLEIL, the French national synchrotron facility (project n° 20150210). This work  
511 benefitted from a French State grant (LabEx Saclay Plant Sciences-SPS, ref. ANR-10-LABX-  
512 0040-SPS), managed by the French National Research Agency under an "Investments for the  
513 Future" program (ref. ANR-11-IDEX-0003-02). The authors declare no competing financial

514 interests. The ChemFlow interface was supported by the Agropolis Foundation under the  
515 reference ID-1401-005 through the "Investissements d'Avenir" program (Labex Agro: ANR-  
516 10-LABX-0001-01).  
517

## References

**Agarwal UP.** 2014. 1064 nm FT-Raman spectroscopy for investigations of plant cell walls and other biomass materials. *Frontiers in plant science* **5**, 490.

**Bekiaris G, Lindedam J, Peltre C, Decker SR, Turner GB, Magid J, Bruun S.** 2015. Rapid estimation of sugar release from winter wheat straw during bioethanol production using FTIR-photoacoustic spectroscopy. *Biotechnology for Biofuels* **8**, 85.

**Beleites C.** 2012. Package ‘hyperSpec’. CRAN package.

**Berk RA.** 2016. Classification and Regression Trees (CART). In: *Statistical learning from a regression perspective*. Cham, Switzerland: Springer Nature, 103-167.

**Brown DM, Zeef LAH, Ellis J, Goodacre R, Turner SR.** 2005. Identification of novel genes in *Arabidopsis* involved in secondary cell wall formation using expression profiling and reverse genetics. *The Plant Cell* **17**, 2281–2295.

**Brown DM, Zhang Z, Stephens E, Dupree P, Turner SR.** 2009. Characterization of IRX10 and IRX10-like reveals an essential role in glucuronoxylan biosynthesis in *Arabidopsis*. *Plant Journal* **57**, 732-746.

**Chen LQ, Qu XQ, Hou BH, Sosso D, Osorio S, Fernie AR, Frommer WB.** 2012. Sucrose efflux mediated by SWEET proteins as a key step for phloem transport. *Science* **335**, 207–211.

**Chylinska M, Szymanska-Chargot M, Zdunek A.** 2014. Imaging of polysaccharides in the tomato cell wall with Raman microspectroscopy. *Plant methods* **10**, 14.

**Earley EJ, Inglad B, Winkler J, Tonsor SJ.** 2009. Inflorescences contribute more than rosettes to lifetime carbon gain in *Arabidopsis thaliana* (Brassicaceae). *American Journal of Botany* **96**, 786-792.

**Edwards HG, Farwell DW, Webster D.** 1997. FT Raman microscopy of untreated natural plant fibres. *Spectrochimica Acta Part A: Molecular and Biomolecular Spectroscopy* **53**, 2383–2392.

**Esau K, Cheadle VI.** 1958. Wall thickening in sieve elements. *Proceedings of the National Academy of Sciences of the USA* **44**, 546–553.

**Faix O.** 1991. Classification of lignins from different botanical origins by FT-IR spectroscopy. *Holzforschung-International Journal of the Biology, Chemistry, Physics and Technology of*

Wood **45**, 21–28.

**Freshour G, Clay RP, Fuller MS, Albersheim P, Darvill AG, Hahn MG.** 1996. Developmental and tissue-specific structural alterations of the cell-wall polysaccharides of *Arabidopsis thaliana* roots. *Plant Physiology* **110**, 1413-1429.

**Gierlinger N, Keplinger T, Harrington M.** 2012. Imaging of plant cell walls by confocal Raman microscopy. *Nature Protocols* **7**, 1694–1708.

**Gierlinger N, Sapei L, Paris O.** 2008. Insights into the chemical composition of *Equisetum hyemale* by high resolution Raman imaging. *Planta* **227**, 969-980.

**Gierlinger N, Schwanninger M.** 2007. The potential of Raman microscopy and Raman imaging in plant research. *Spectroscopy* **21**, 69–89.

**Gorzsás A, Stenlund H, Persson P, Trygg J, Sundberg B.** 2011. Cell-specific chemotyping and multivariate imaging by combined FT-IR microspectroscopy and orthogonal projections to latent structures (OPLS) analysis reveals the chemical landscape of secondary xylem. *The Plant Journal* **66**, 903–914.

**Guillon F, Bouchet B, Jamme F, Robert P, Quéméner B, Barron C, Larré C, Dumas P, Saulnier L.** 2011. Brachypodium distachyon grain: characterization of endosperm cell walls. *Journal of Experimental Botany* **62**, 1001–1015.

**Hall HC, Cheung J, Ellis BE.** 2013. Immunoprofiling reveals unique cell-specific patterns of wall epitopes in the expanding *Arabidopsis* stem. *Plant Journal* **74**, 134-147.

**Le Hir R, Beneteau J, Bellini C, Vilaine F, Dinant S.** 2008. Gene expression profiling: keys for investigating phloem functions. *Trends in Plant Science* **13**, 273–280.

**Le Hir R, Spinner L, Klemens P, et al.** 2015. Disruption of the sugar transporters AtSWEET11 and AtSWEET12 affects vascular development and freezing tolerance in *Arabidopsis*. *Molecular Plant* **8**, 1687–1690.

**Hothorn T, Hornik K, van de Wiel M, Zeileis A.** 2008. Implementing a class of permutation tests: the coin package. *Journal of Statistical Software* **28**.

**Johnson K.** 2018. Sugar coating the phloem sieve element wall. *Plant Physiology* **176**, 1408–1409.

**Kačuráková M, Smith AC, Gidley MJ, Wilson RH.** 2002. Molecular interactions in bacterial

cellulose composites studied by 1D FT-IR and dynamic 2D FT-IR spectroscopy. *Carbohydrate Research* **337**, 1145–1153.

**Kim JS, Daniel G.** 2012. Immunolocalization of hemicelluloses in *Arabidopsis thaliana* stem. Part I: Temporal and spatial distribution of xylans. *Planta* **236**, 1275-1288.

**Kubo S, Kadla JF.** 2005. Hydrogen bonding in lignin: a fourier transform infrared model compound study. *Biomacromolecules* **6**, 2815-2821.

**Largo-Gosens A, Hernandez-Altamirano M, Garcia-Calvo L, Alonso-Simon A, Alvarez J, Acebes JL.** 2014. Fourier transform mid infrared spectroscopy applications for monitoring the structural plasticity of plant cell walls. *Frontiers in Plant Science* **5**, 303.

**Lefebvre V, Fortabat M-N, Ducamp A, North HM, Maia-Grondard A, Trouverie J, Boursiac Y, Mouille G, Durand-Tardif M.** 2011. ESKIMO1 disruption in *Arabidopsis* alters vascular tissue and impairs water transport. *PLoS One* **6**, e16645.

**Marchessault R.** 1962. Application of infra-red spectroscopy to cellulose and wood polysaccharides. *Pure Applied Chemistry* **5**, 107–129.

**Marchessault R, Liang C.** 1962. The infrared spectra of crystalline polysaccharides VIII. Xylans. *Journal of polymer science part A-Polymer Chemistry* **59**, 357–378.

**Marriott PE, Gómez LD, Mcqueen-Mason SJ.** 2016. Unlocking the potential of lignocellulosic biomass through plant science. *New Phytologist* **209**, 1366–1381.

**Maru V, Hewale S, Mantri H, Ranade V.** 2015. Partial purification and characterization of mannan oligosaccharides from cell wall of *Saccharomyces cerevisiae*. *International Journal of Current Microbiology and Applied Sciences* **4**, 705–711.

**Maxime H.** 2017. RVAideMemoire: Diverse Basic Statistical and Graphical Functions. R package 0.9-57.

**Mohebbi B.** 2010. Application of ATR infrared spectroscopy in wood acetylation. *Journal of Agricultural Science and Technology* **10**, 253–259.

**Mouille G, Robin S, Lecomte M, Pagant S, Hofte H.** 2003. Classification and identification of *Arabidopsis* cell wall mutants using Fourier-Transform InfraRed (FT-IR) microspectroscopy. *Plant Journal* **35**, 393–404.

**Mouille G, Witucka-Wall H, Bruyant MP, Loudet O, Pelletier S, Rihouey C, Lerouxel O,**

**Lerouge P, Höfte H, Pauly M.** 2006. Quantitative trait loci analysis of primary cell wall composition in Arabidopsis. *Plant Physiology* **141**, 1035–1044.

**Ohman D, Demedts B, Kumar M, Gerber L, Gorzsas A, Goeminne G, Hedenström M, Ellis B, Boerjan W, Sundberg B.** 2013. MYB103 is required for FERULATE-5-HYDROXYLASE expression and syringyl lignin biosynthesis in Arabidopsis stems. *Plant Journal* **73**, 63–76.

**Owen NL, Thomas DW.** 1989. Infrared studies of ‘hard’ and ‘soft’ woods. *Applied Spectroscopy* **43**, 451-455.

**Özparpucu M, Gierlinger N, Burgert I, Van Acker R, Vanholme R, Boerjan W, Pilate G, Déjardin A, Rüggeberg M.** 2017*a*. The effect of altered lignin composition on mechanical properties of CINNAMYL ALCOHOL DEHYDROGENASE (CAD) deficient poplars. *Planta* **247**, 887-897.

**Özparpucu M, Rüggeberg M, Gierlinger N, Cesarino I, Vanholme R, Boerjan W, Burgert I.** 2017*b*. Unravelling the impact of lignin on cell wall mechanics: a comprehensive study on young poplar trees downregulated for CINNAMYL ALCOHOL DEHYDROGENASE (CAD). *Plant Journal* **91**, 480–490.

**Pawar PM-A, Koutaniemi S, Tenkanen M, Mellerowicz EJ.** 2013. Acetylation of woody lignocellulose: significance and regulation. *Frontiers in Plant Science* **4**.

**Pelloux J, Rusterucci C, Mellerowicz EJ.** 2007. New insights into pectin methylesterase structure and function. *Trends in Plant Science* **12**, 267–277.

**Persson S, Caffall KH, Freshour G, Hilley MT, Bauer S, Poindexter P, Hahn MG, Mohnen D, Somerville C.** 2007. The Arabidopsis irregular xylem8 mutant is deficient in glucuronoxylan and homogalacturonan, which are essential for secondary cell wall integrity. *The Plant Cell Online* **19**, 237–255.

**Prats Mateu B, Hauser MT, Heredia A, Gierlinger N.** 2016. Waterproofing in Arabidopsis: Following Phenolics and Lipids In situ by Confocal Raman Microscopy. *Frontiers in chemistry* **4**, 10.

**R Core Team.** 2016. R: a language and environment for statistical computing. R Foundation for Statistical Computing, Vienna, Austria. URL <http://www.R-project.org/>.

**Robin S, Lecomte M, Höfte H, Mouille G.** 2003. A procedure for the clustering of cell wall

mutants in the model plant *Arabidopsis* based on Fourier-transform infrared (FT-IR) spectroscopy. *Journal of Applied Statistics* **30**, 669–681.

**Roger JM, Palagos B, Bertrand D, Fernandez-Ahumada E.** 2011. CovSel: Variable selection for highly multivariate and multi-response calibration. Application to IR spectroscopy. *Chemometrics and Intelligent Laboratory Systems* **2**, 216-223.

**Schmidt M, Schwartzberg AM, Carroll A, Chaibang A, Adams PD, Schuck PJ.** 2010. Raman imaging of cell wall polymers in *Arabidopsis thaliana*. *Biochemical and Biophysical Research Communications* **395**, 521–523.

**Schuetz M, Smith R, Ellis B.** 2012. Xylem tissue specification, patterning, and differentiation mechanisms. *Journal of Experimental Botany* **64**, 11-31.

**Sibout R, Eudes A, Mouille G, Pollet B, Lapierre C, Jouanin L, Séguin A.** 2005. CINNAMYL ALCOHOL DEHYDROGENASE-C and -D are the primary genes involved in lignin biosynthesis in the floral stem of *Arabidopsis*. *The Plant cell* **17**, 2059–2076.

**Sjölund RD.** 1997. The phloem sieve elements: a river runs through it. *Plant Cell* **9**, 1137–1146.

**Smith RA, Schuetz M, Karlen SD, Bird D, Tokunaga N, Sato Y, Mansfield SD, Ralph J, Samuels AL.** 2017. Defining the Diverse Cell Populations Contributing to Lignification in *Arabidopsis thaliana* Stems. *Plant Physiology* **174**, 1028–1036.

**Tolbert AK, Ma T, Kalluri UC, Ragauskas AJ.** 2016. Determining the Syringyl/Guaiacyl Lignin Ratio in the Vessel and Fiber Cell Walls of Transgenic *Populus* Plants. *Energy and Fuels* **30**, 5716–5720.

**Torode T, O'Neill R, Marcus SE, et al.** 2017. Branched pectic galactan in phloem-sieve-element cell walls: implications for cell mechanics. *Plant Physiology* **176**, 1547-1558.

**Vijayan P, Willick IR, Lahlali R, Karunakaran C, Tanino KK.** 2015. Synchrotron radiation sheds fresh light on plant research: the use of powerful techniques to probe structure and composition of plants. *Plant and Cell Physiology* **56**, 1252-1263.

**Wickham H.** 2009. *ggplot2 elegant graphics for data analysis*. Cham, Switzerland: Springer Nature.

**Zimmermann B, Bağcıoğlu M, Sandt C, Kohler A.** 2015. Vibrational microspectroscopy

enables chemical characterization of single pollen grains as well as comparative analysis of plant species based on pollen ultrastructure. *Planta* **242**, 1237–1250.



**Table 1.** Assignment of the infrared wavenumbers found to differentiate xylem and phloem tissues of the wild-type *Arabidopsis* floral stem.

| Tissue | FTIR wavenumber (cm <sup>-1</sup> ) | Assignment                                                                                       | Polymer                      |
|--------|-------------------------------------|--------------------------------------------------------------------------------------------------|------------------------------|
| Xylem  | 1510                                | G-type lignin (Faix, 1991)                                                                       | Lignin                       |
|        | 1595                                | G-type lignin (Faix, 1991)                                                                       | Lignin                       |
|        | 1269                                | Guaiacyl ring breathing with carbonyl stretching (Kubo and Kadla, 2005)                          | Lignin                       |
|        | 1030                                | C-H deformation in guaiacyl with C-O deformation in the primary alcohol (Kubo and Kadla, 2005)   | Lignin                       |
|        | 1060                                | C-C linkage of G condensed unit (Sibout <i>et al.</i> , 2005)                                    | Lignin                       |
|        | 1045                                | C-O-C contribution of xylan (Brown <i>et al.</i> , 2009)                                         | Hemicellulose                |
|        | 1369                                | Deformation of the C-H linkages in the methyl group of <i>O</i> -acetyl moieties (Mohebbi, 2010) | Hemicellulose                |
|        | 1230-1235                           | C=O/C-O linkages stretching vibrations (Mohebbi, 2010)                                           | Hemicellulose                |
|        | 1743                                | Stretching of the free carbonyl group (Owen and Thomas, 1989)                                    | Hemicellulose                |
|        | 1245                                | C-O stretch (Faix, 1991)                                                                         | Hemicellulose                |
|        | 1735-1740                           | C=O stretching in glucuronic acid (xylan) (Marchessault, 1962; Marchessault and Liang, 1962)     | Hemicellulose                |
|        | 1762                                | Esterified pectins (Kačuráková <i>et al.</i> , 2002)                                             | Pectins                      |
| Phloem | 1639                                | COOH group (Mouille <i>et al.</i> , 2006)                                                        | Acidic pectins               |
|        | 1677                                | COOH group (Mouille <i>et al.</i> , 2006)                                                        | Acidic pectins               |
|        | 1157                                | C-O-C linkages of cellulose (Kačuráková <i>et al.</i> , 2002)                                    | Cellulose                    |
|        | 1442                                | To be assigned (Mouille <i>et al.</i> , 2003)                                                    | Related to primary cell wall |
|        | 1111                                | In plane ring stretching (Bekiaris <i>et al.</i> , 2015)                                         | Cellulose                    |
|        | 1712                                | C=O stretch (Kačuráková <i>et al.</i> , 2002)                                                    | Pectins                      |
|        | 978                                 | Xylan-type polysaccharides (Brown <i>et al.</i> , 2005)                                          | Hemicellulose                |
|        | 958                                 | Sugar ring vibrations (Kačuráková <i>et al.</i> , 2002)                                          | Pectins                      |
|        | 1475                                | To be assigned                                                                                   | To be assigned               |
|        | 1550                                | Carboxylates (Mouille <i>et al.</i> , 2006)                                                      | Cellulose                    |
|        | 1774                                | To be assigned                                                                                   | Esterified pectins           |

**Table 2.** Classification results for using FTIR wavenumbers to predict which genotype a phloem tissue sample represents, with the model calibration dataset (80% of total dataset) using a ten-fold cross-validation method, and the validation dataset (20% of total dataset) using a CART-based algorithm. NPV: negative predictive value, PPV: positive predictive value.

| Calibration model (after ten-fold cross-validation) |                       | Prediction           |                       | Accuracy<br>0.905 |
|-----------------------------------------------------|-----------------------|----------------------|-----------------------|-------------------|
|                                                     |                       | wild-type            | <i>sweet11sweet12</i> |                   |
|                                                     | wild-type             | 125                  | 10                    | PPV<br>0.926/     |
|                                                     | <i>sweet11sweet12</i> | 16                   | 124                   | NPV<br>0.886/     |
|                                                     |                       | Sensitivity<br>0.886 | Specificity<br>0.925  |                   |

  

| Validation model |                       | Prediction           |                       | Accuracy<br>0.808 |
|------------------|-----------------------|----------------------|-----------------------|-------------------|
|                  |                       | wild-type            | <i>sweet11sweet12</i> |                   |
|                  | wild-type             | 24                   | 8                     | PPV<br>0.75       |
|                  | <i>sweet11sweet12</i> | 5                    | 31                    | NPV<br>0.861      |
|                  |                       | Sensitivity<br>0.827 | Specificity<br>0.794  |                   |

**Table 3.** Classification results for using Raman shifts to predict different xylem cell types, with the model calibration dataset (80% of the total dataset) using a ten-fold cross-validation method, and the validation dataset (20% of the total dataset) using a CART-based algorithm. For the calculation of the different parameters, one cell type was compared to the two others. FF: cell wall between two xylem fibers, NPV: negative predictive value, PPV: positive predictive value, VF: cell wall between xylem vessel and fiber, VV: cell wall between two xylem vessels.

|                                                               |    | Raman prediction                      |                                       |                                       | Accuracy<br>0.859     |
|---------------------------------------------------------------|----|---------------------------------------|---------------------------------------|---------------------------------------|-----------------------|
|                                                               |    | VV                                    | VF                                    | FF                                    |                       |
| Calibration<br>model (after<br>ten-fold cross-<br>validation) | VV | 18                                    | 0                                     | 0                                     | PPV/NPV<br>1/0.869    |
|                                                               | VF | 6                                     | 27                                    | 1                                     | PPV/NPV<br>0.777/0.9  |
|                                                               | FF | 0                                     | 2                                     | 10                                    | PPV/NPV<br>0.833/0.98 |
|                                                               |    | Sensitivity/Specificity<br>0.75/0.869 | Sensitivity/Specificity<br>0.931/0.72 | Sensitivity/Specificity<br>0.90/0.962 |                       |

  

|                     |    | Raman prediction                   |                                        |                                   | Accuracy<br>0.8        |
|---------------------|----|------------------------------------|----------------------------------------|-----------------------------------|------------------------|
|                     |    | VV                                 | VF                                     | FF                                |                        |
| Validation<br>model | VV | 4                                  | 4                                      | 0                                 | PPV/NPV<br>0.5/0.846   |
|                     | VF | 0                                  | 14                                     | 2                                 | PPV/NPV<br>0.875/0.714 |
|                     | FF | 0                                  | 0                                      | 6                                 | PPV/NPV<br>1/0.916     |
|                     |    | Sensitivity/Specificity<br>1/0.846 | Sensitivity/Specificity<br>0.777/0.833 | Sensitivity/Specificity<br>0.75/1 |                        |

**Table 4.** Classification results for using Raman shifts to predict which genotype cell walls between xylem vessels represent, with the model calibration dataset (80% of total dataset) using a ten-fold cross-validation method, and the validation dataset (20% of total dataset) using a CART-based algorithm. NPV: negative predictive value, PPV: positive predictive value.

|                               |                                                                  |                       |                      |                       |              |
|-------------------------------|------------------------------------------------------------------|-----------------------|----------------------|-----------------------|--------------|
| Xylem vessel<br>/Xylem vessel |                                                                  |                       | Raman prediction     |                       | Accuracy     |
|                               |                                                                  |                       | wild-type            | <i>sweet11sweet12</i> | 88.9%        |
|                               | Calibration<br>model (after<br>ten-fold<br>cross-<br>validation) | wild-type             | 33                   | 2                     | PPV<br>94.2% |
|                               |                                                                  | <i>sweet11sweet12</i> | 7                    | 39                    | NPV<br>84.7% |
|                               |                                                                  |                       | Sensitivity<br>82.5% | Specificity<br>95.1%  |              |
|                               |                                                                  |                       | Raman prediction     |                       | Accuracy     |
|                               |                                                                  |                       | wild-type            | <i>sweet11sweet12</i> | 80%          |
|                               | Validation<br>model                                              | wild-type             | 10                   | 1                     | PPV<br>90%   |
|                               |                                                                  | <i>sweet11sweet12</i> | 2                    | 6                     | NPV<br>75%   |
|                               |                                                                  |                       | Sensitivity<br>76.9% | Specificity<br>85.7%  |              |

**Table 5.** Classification results for using Raman shifts to predict which genotype cell walls between a xylem vessel and fiber represent, with the model calibration dataset (80% of total dataset) using a ten-fold cross-validation method, and the validation dataset (20% of total dataset) using a CART-based algorithm. NPV: negative predictive value, PPV: positive predictive value.

|                              |                                                                  |                       |                      |                       |              |
|------------------------------|------------------------------------------------------------------|-----------------------|----------------------|-----------------------|--------------|
| Xylem vessel<br>/Xylem fiber |                                                                  |                       | Raman prediction     |                       | Accuracy     |
|                              |                                                                  |                       | wild-type            | <i>sweet11sweet12</i> | 84.7%        |
|                              | Calibration<br>model (after<br>ten-fold<br>cross-<br>validation) | wild-type             | 82                   | 12                    | PPV<br>87.2% |
|                              |                                                                  | <i>sweet11sweet12</i> | 30                   | 152                   | NPV<br>83.5% |
|                              |                                                                  |                       | Sensitivity<br>73.2% | Specificity<br>92.7%  |              |
|                              |                                                                  |                       | Raman prediction     |                       | Accuracy     |
|                              |                                                                  |                       | wild-type            | <i>sweet11sweet12</i> | 88.4%        |
|                              | Validation<br>model                                              | wild-type             | 17                   | 6                     | PPV<br>73.9% |
|                              |                                                                  | <i>sweet11sweet12</i> | 2                    | 44                    | NPV<br>95.6% |
|                              |                                                                  |                       | Sensitivity<br>89.4% | Specificity<br>88%    |              |

**Table 6.** Classification results for using Raman shifts to predict which genotype cell walls between xylem fibers represent, with the model calibration dataset (80% of total dataset) using a ten-fold cross-validation method, and the validation dataset (20% of total dataset) using a CART-based algorithm. NPV: negative predictive value, PPV: positive predictive value.

|                             |                                                                  |                       |                      |                       |              |
|-----------------------------|------------------------------------------------------------------|-----------------------|----------------------|-----------------------|--------------|
| Xylem fiber<br>/Xylem fiber |                                                                  |                       | Raman prediction     |                       | Accuracy     |
|                             |                                                                  |                       | wild-type            | <i>sweet11sweet12</i> | 83.8%        |
|                             | Calibration<br>model (after<br>ten-fold<br>cross-<br>validation) | wild-type             | 90                   | 14                    | PPV<br>86.5% |
|                             |                                                                  | <i>sweet11sweet12</i> | 11                   | 39                    | NPV<br>78%   |
|                             |                                                                  |                       | Sensitivity<br>89.1% | Specificity<br>73.5%  |              |
|                             |                                                                  |                       | Raman prediction     |                       | Accuracy     |
|                             |                                                                  |                       | wild-type            | <i>sweet11sweet12</i> | 73.7%        |
|                             | Validation<br>model                                              | wild-type             | 14                   | 3                     | PPV<br>82.3% |
|                             |                                                                  | <i>sweet11sweet12</i> | 7                    | 14                    | NPV<br>66.7% |
|                             |                                                                  |                       | Sensitivity<br>66.7% | Specificity<br>82.3%  |              |

## Figure Legends

### **Fig. 1. Principal Component Analysis (PCA) of infrared spectra obtained from phloem and xylem cells of *Arabidopsis* wild-type floral stem.**

(A) Average spectra for wild-type phloem (red line) and xylem (blue line) tissues obtained by SR-FTIR microscopy. Spectra were baseline-corrected and area-normalized in the range of 1800-850  $\text{cm}^{-1}$ . (B) Comparison of phloem and xylem cell wall composition by multivariate analysis. An average of 150 spectra from xylem (blue boxes) or phloem (red circles) cell walls were compared. A scoreplot based on PC1 and PC2 from the Principal Component Analysis (PCA) shows that phloem and xylem cell wall spectral signatures can be differentiated. (C) The corresponding loading plot of the PC1 axis is presented.

### **Fig. 2. Comparative analysis of wild-type and *sweet11-Isweet12-1* xylem or phloem SR-FTIR spectra.**

(A-B) Boxplot representation of the hemicellulose/cellulose ratio of xylem (A) and phloem (B) spectra. For the xylem spectra, the box and whisker plots represent values from 521 and 494 individual spectra of wild-type and *sweet11-Isweet12-1* lines, respectively. For the phloem spectra, the box and whisker plots represent the values from 314 and 311 individual spectra of wild-type and *sweet11-Isweet12-1* lines, respectively. The diamonds represent mean values, lines represent median values, the tops and bottoms of the boxes represent the first and third quartiles, respectively, and whisker extremities represent maximum and minimum data points. The black dots are the outliers. Letters above the boxes indicate groups with significant differences as determined by an approximate Fisher-Pitman permutation test and a pairwise comparison test ( $P < 0.05$ ). a.u.: arbitrary unit. (C) The classification tree has been generated by the CART method after ten-fold cross-validation of the calibration dataset model, which was built using the 850-1800  $\text{cm}^{-1}$  range of phloem spectra. The binary classification tree is composed of five classifiers and 6 terminal subgroups. The decision-making process involves the evaluation of if-then rules of each node from top to bottom, which eventually reaches a terminal node with the designated class outcome (WT: wild-type and DM: *sweet11-Isweet12-1*). The numbers in each terminal subgroup represent numbers of either WT or DM spectra.

**Fig. 3. Raman spectra analysis of the different xylem cell types in wild-type plants.**

(A-C) Boxplot representation of the lignin/C-H stretching band ratio (A), lignin/C-O and C-C bond stretching ratio (B) and C-H stretching band/C-O and C-C bond stretching ratio (C) in secondary cell walls between different xylem cell types. The box and whisker plots represent values from 51, 139 and 119 individual spectra of VV, VF and FF, respectively. The diamonds represent mean values, lines represent median values, the tops and bottoms of the boxes represent the first and third quartiles, respectively, and whisker extremities represent maximum and minimum data points. The black dots are the outliers. Letters above the boxes indicate groups with significant differences as determined by an approximate Fisher-Pitman permutation test and a pairwise comparison test ( $P < 0.05$ ). a.u.: arbitrary unit. (F) The classification tree has been generated by the CART method after ten-fold cross-validation of the calibration dataset model, which was built using the 1000-1800  $\text{cm}^{-1}$  range from the Raman spectra of different xylem cell types. The binary classification tree is composed of four classifiers and 5 terminal subgroups. The decision-making process involves the evaluation of if-then rules of each node from top to bottom, which eventually reaches a terminal node with the designated class outcome (VV: vessel/vessel cell wall, VF: vessel/fiber cell wall and FF: fiber/fiber cell wall). The numbers in each terminal subgroup stand for the number of VV, VF or FF spectra.

**Fig. 4. CART classification of wild-type and *sweet11-1sweet12-1* xylem Raman spectra.**

The classification trees have been generated by the CART method after ten-fold cross-validation of the calibration dataset model, which was built using the 1800-1000  $\text{cm}^{-1}$  range from the Raman spectra of cell walls between two xylem vessels (A), between a xylem vessel and a fiber (B) and between two xylem fibers (C). The decision-making process involves the evaluation of if-then rules of each node from top to bottom, which eventually reaches a terminal node with the designated class outcome (WT: wild-type and DM: *sweet11-1sweet12-1*). The numbers in each terminal subgroup stand for the number of either WT or DM spectra.



**Fig. 1**

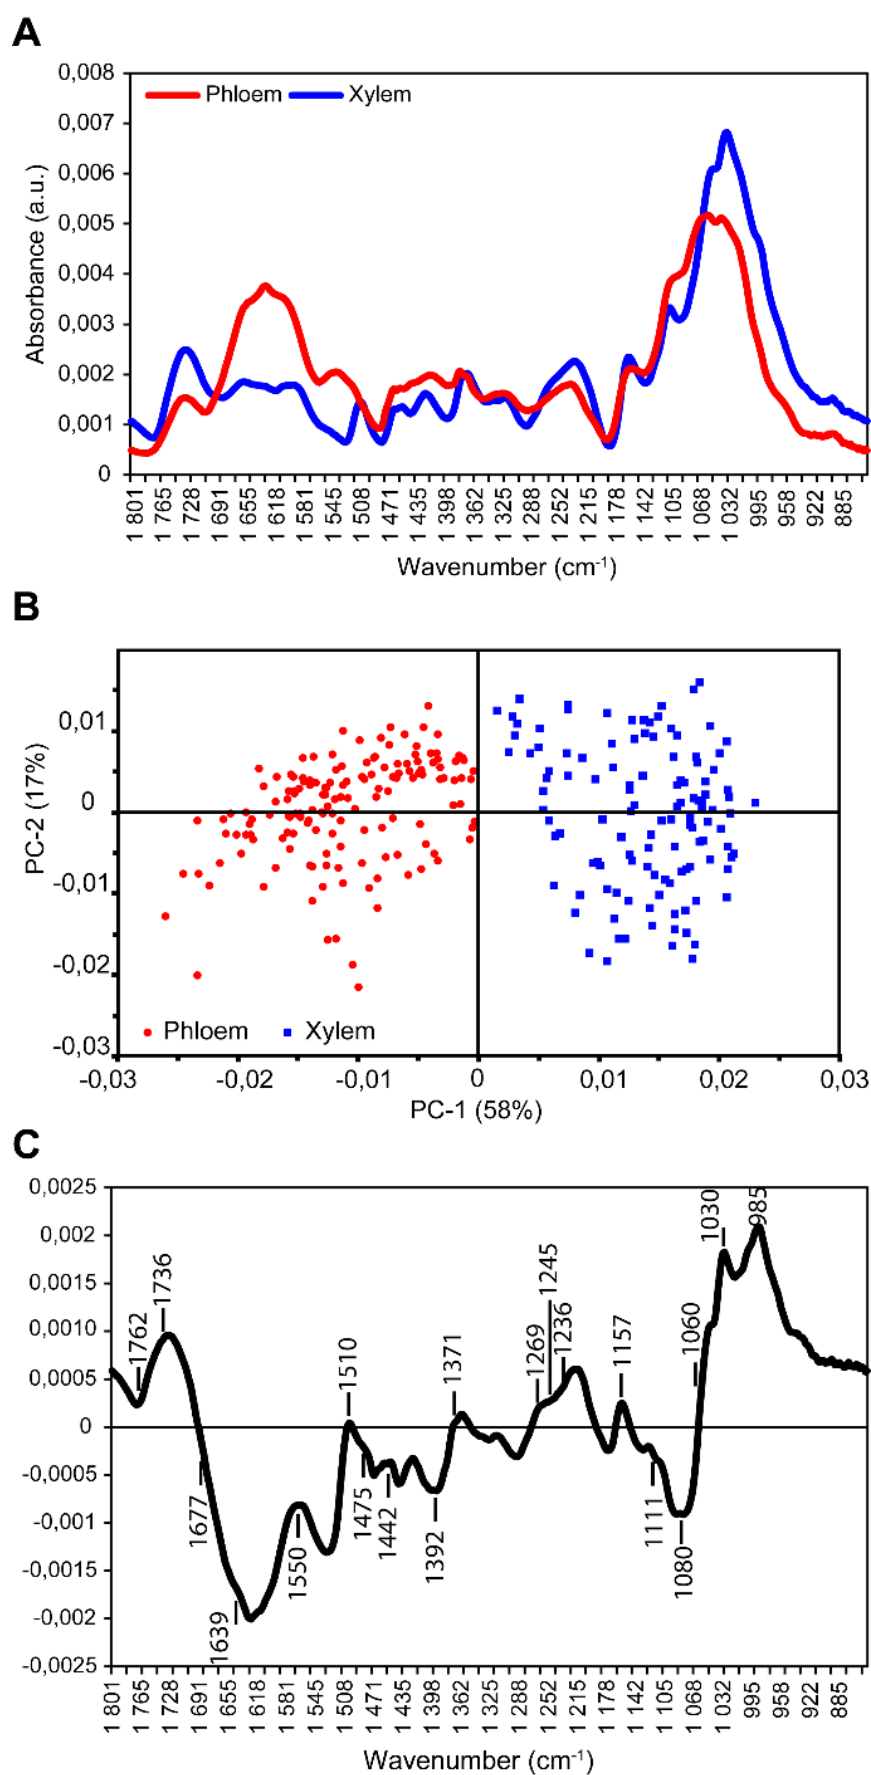

**Fig. 2**

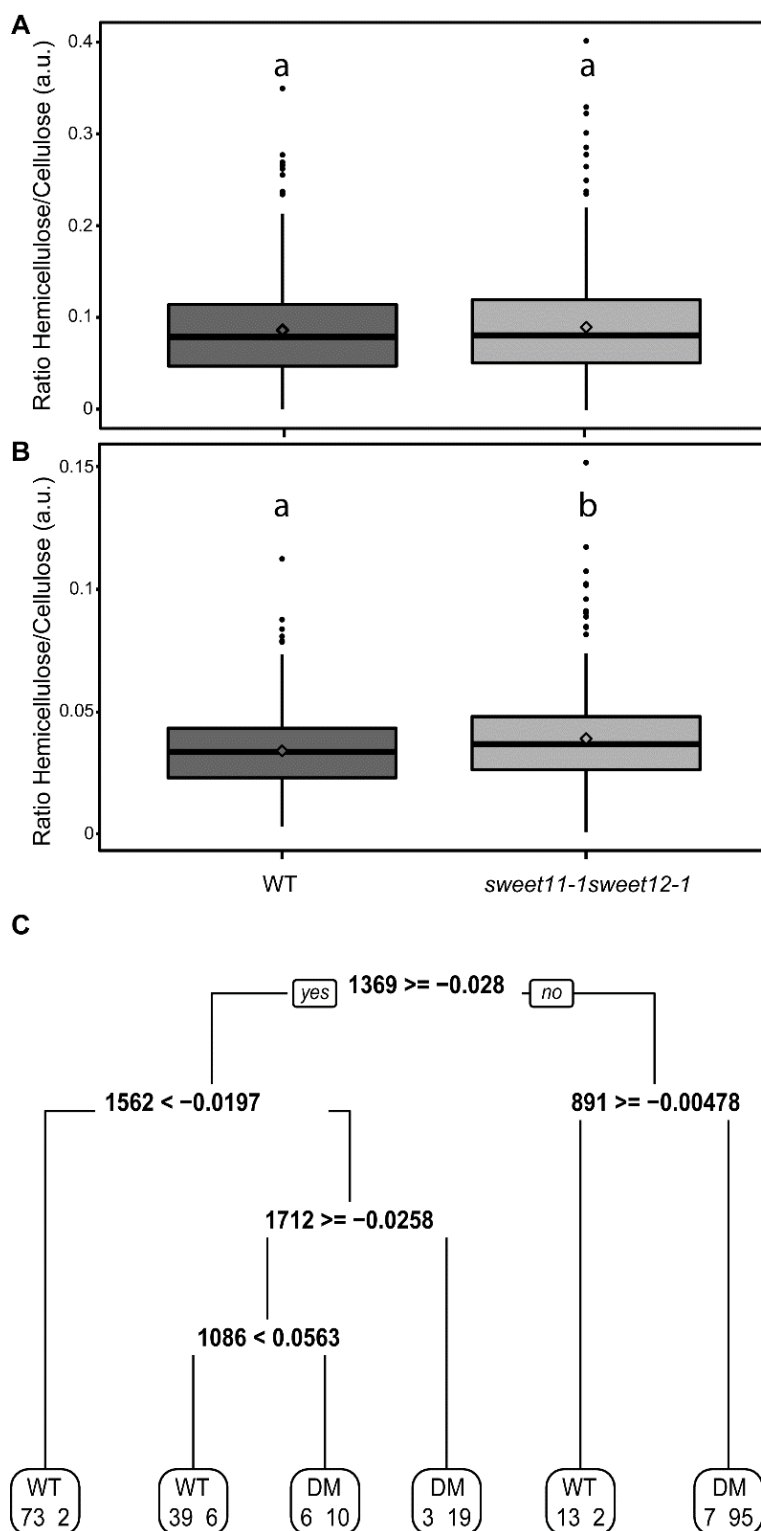

**Fig. 3**

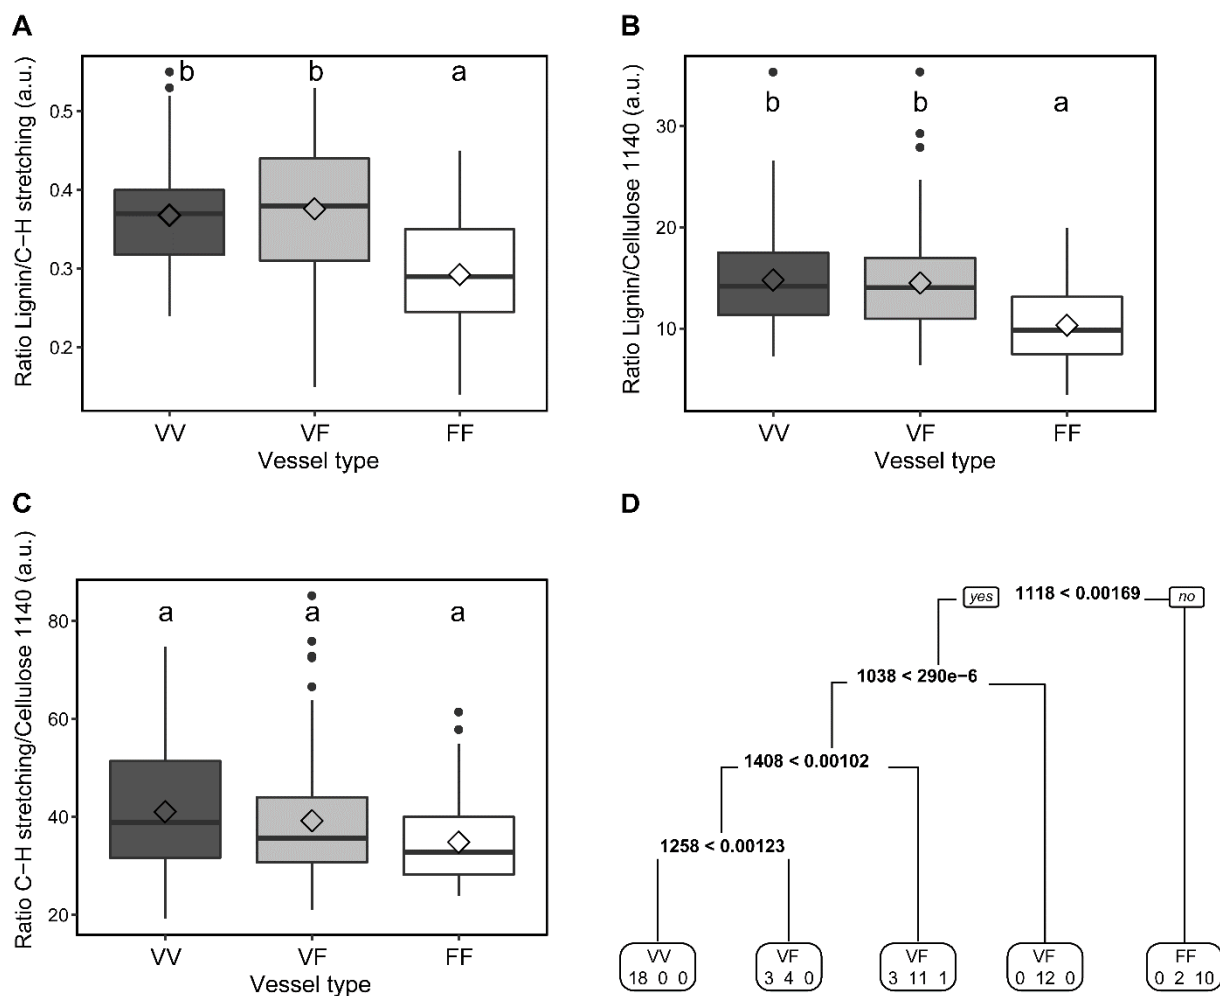

**Fig. 4**

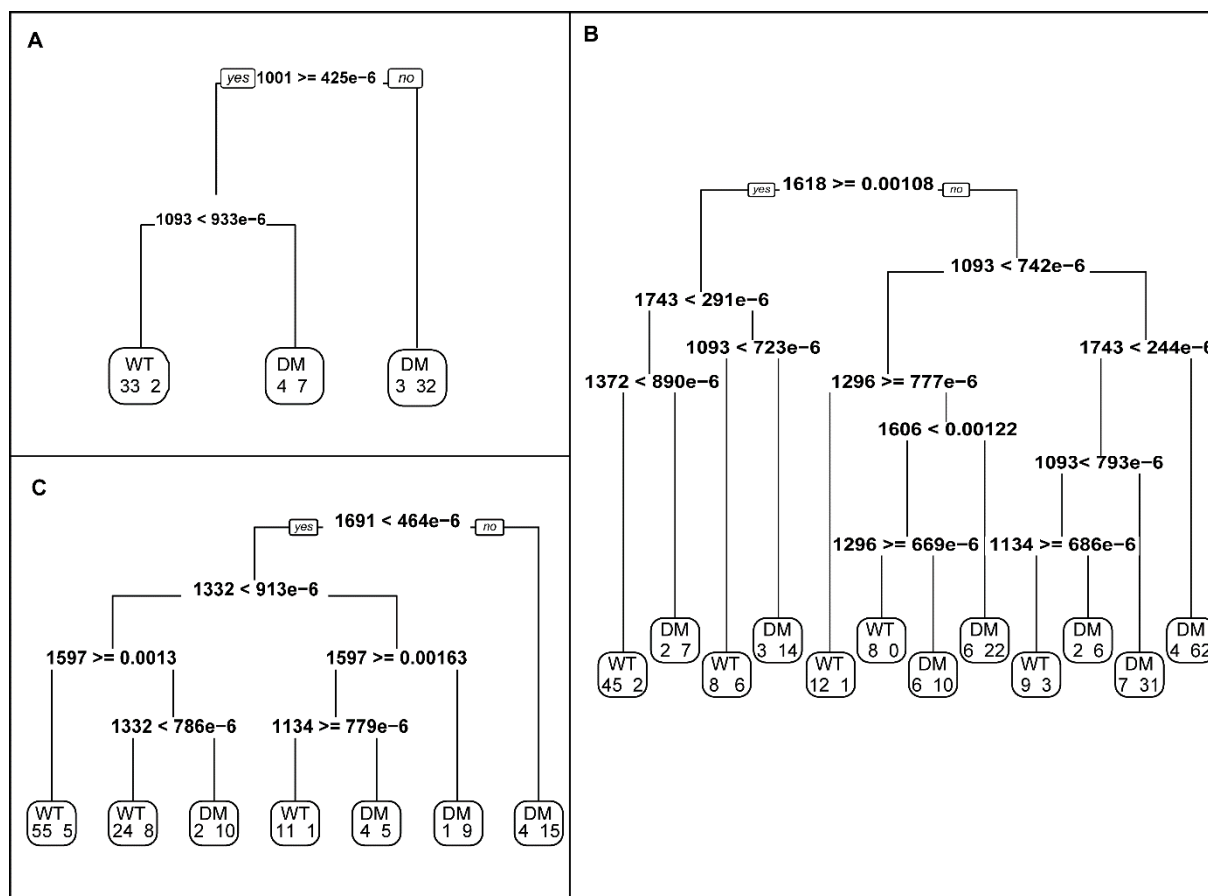

Source: https://www.biorxiv.org/content/10.1101/343343v1.full.pdf
